# Supplementary material for: Single Antenatal Exposure to Ciclesonide Reduces Long-Term Cardiac Structural and Functional Alterations Compared to Currently Approved Synthetic Corticosteroids
Source: Research Square preprint supplement (doi:10.21203/rs.3.rs-9283462/v1), 2026-05-18
Supplement: Supplementary file 1 [file 153de64c0dcb60a1c98a7574.docx]

**Supplementary Tables**

**Supplementary Table 1: Primer Identities of K+ & Ca2+ Cardiac Ion Channel Genes Studied**

| Gene | Forward | Reverse | Length |
| --- | --- | --- | --- |
| KCNN2 (SK2/KCa2.2) | ATGTCATGCCCCATTGTTTTG | CCATGTCAGAGCTGTTAAAGCTG | F: 22  R: 23 |
| KCNJ2 (Kir2.1/IRK1/LQT7) | ATGGGCAGTGTGAGAACCAAC | TGGACTTTACTCTTGCCATTCC | F: 21  R: 22 |
| CACNB2 (CAB2/MYSB) | GGAAGGCTGAAGAGTTCGGAC | TGCAACAGGTTTTGTCTTTGCT | F: 21  R: 22 |
| CACNA1H(Cav3.2/ECA6) | GAACGTGGTTCTTTACAACGGC | GCACATAGTTCCCAAAGGTCA | F: 22  R: 21 |

**Supplementary Table 2: Body Weight Gain Over Time**

| One-Way ANOVA with Dunnett’s Post-Hoc | Mean Weight (g) | 95.00% CI of Diff. | Adjusted  P- Value |
| --- | --- | --- | --- |
| Birth | | | |
| Veh | 10.833 |  |  |
| Dex | 7.189 | 1.076 to 4.166 | 0.0003 |
| Beta | 7.438 | 0.8519 to 3.891 | 0.0008 |
| Cic | 7.962 | 0.3288 to 3.368 | 0.0116 |
| Week 1 | | | |
| Veh | 20.201 |  |  |
| Dex | 15.25 | 2.099 to 8.401 | 0.0008 |
| Beta | 16.34 | 1.208 to 7.104 | 0.0044 |
| Cic | 17.93 | -0.4960 to 5.629 | 0.1126 |
| Week 10 | | | |
| Veh | 37.80 |  |  |
| Dex | 40.15 | -11.84 to 1.744 | 0.1854 |
| Beta | 39.42 | -11.10 to 2.475 | 0.2937 |
| Cic | 41.83 | -13.65 to 0.1990 | 0.0587 |
| Week 17 | | | |
| Veh | 42.01 |  |  |
| Dex | 43.88 | -15.62 to -1.182 | 0.0189 |
| Beta | 41.04 | -12.78 to 1.656 | 0.1634 |
| Cic | 43.36 | -15.25 to -0.5204 | 0.0332 |
| Week 19 | | | |
| Veh | 43.16 |  |  |
| Dex | 45.52 | -13.59 to 0.5356 | 0.0758 |
| Beta | 42.36 | -10.43 to 3.697 | 0.5184 |
| Cic | 46.27 | -14.48 to -0.07259 | 0.0472 |
| Week 21 | | | |
| Veh | 44.11 |  |  |
| Dex | 44.8 | -11.37 to 3.399 | 0.4321 |
| Beta | 41.68 | -8.248 to 6.522 | 0.9854 |
| Cic | 44.39 | -11.13 to 3.980 | 0.5373 |
| Week 35 | | | |
| Veh | 52.61 |  |  |
| Dex | 53.25 | -19.94 to -4.931 | 0.0006 |
| Beta | 50.13 | -16.82 to -1.808 | 0.0112 |
| Cic | 52.51 | -19.37 to -4.019 | 0.0015 |
| Week 92 | | | |
| Veh | 54.57 |  |  |
| Dex | 72 | -28.57 to -6.287 | 0.0023 |
| Beta | 44.2 | -0.03661 to 20.78 | 0.0509 |
| Cic | 49.8 | -5.637 to 15.18 | 0.5291 |
